# Supplementary material for: Combined metabolomics and microbiota analysis reveals the therapeutic effect of indole-3-propionic acid on ovariectomy-induced osteoporosis
Source: Research Square preprint supplement (doi:10.21203/rs.3.rs-8772001/v1), 2026-02-23
Supplement: Supplementary file 1 [file 4716c8c86b002086973d0fad.docx]

**Indole-3-propionic acid attenuates ovariectomy-induced osteoporosis by modulating inflammation, bone metabolism, and gut microbiota**


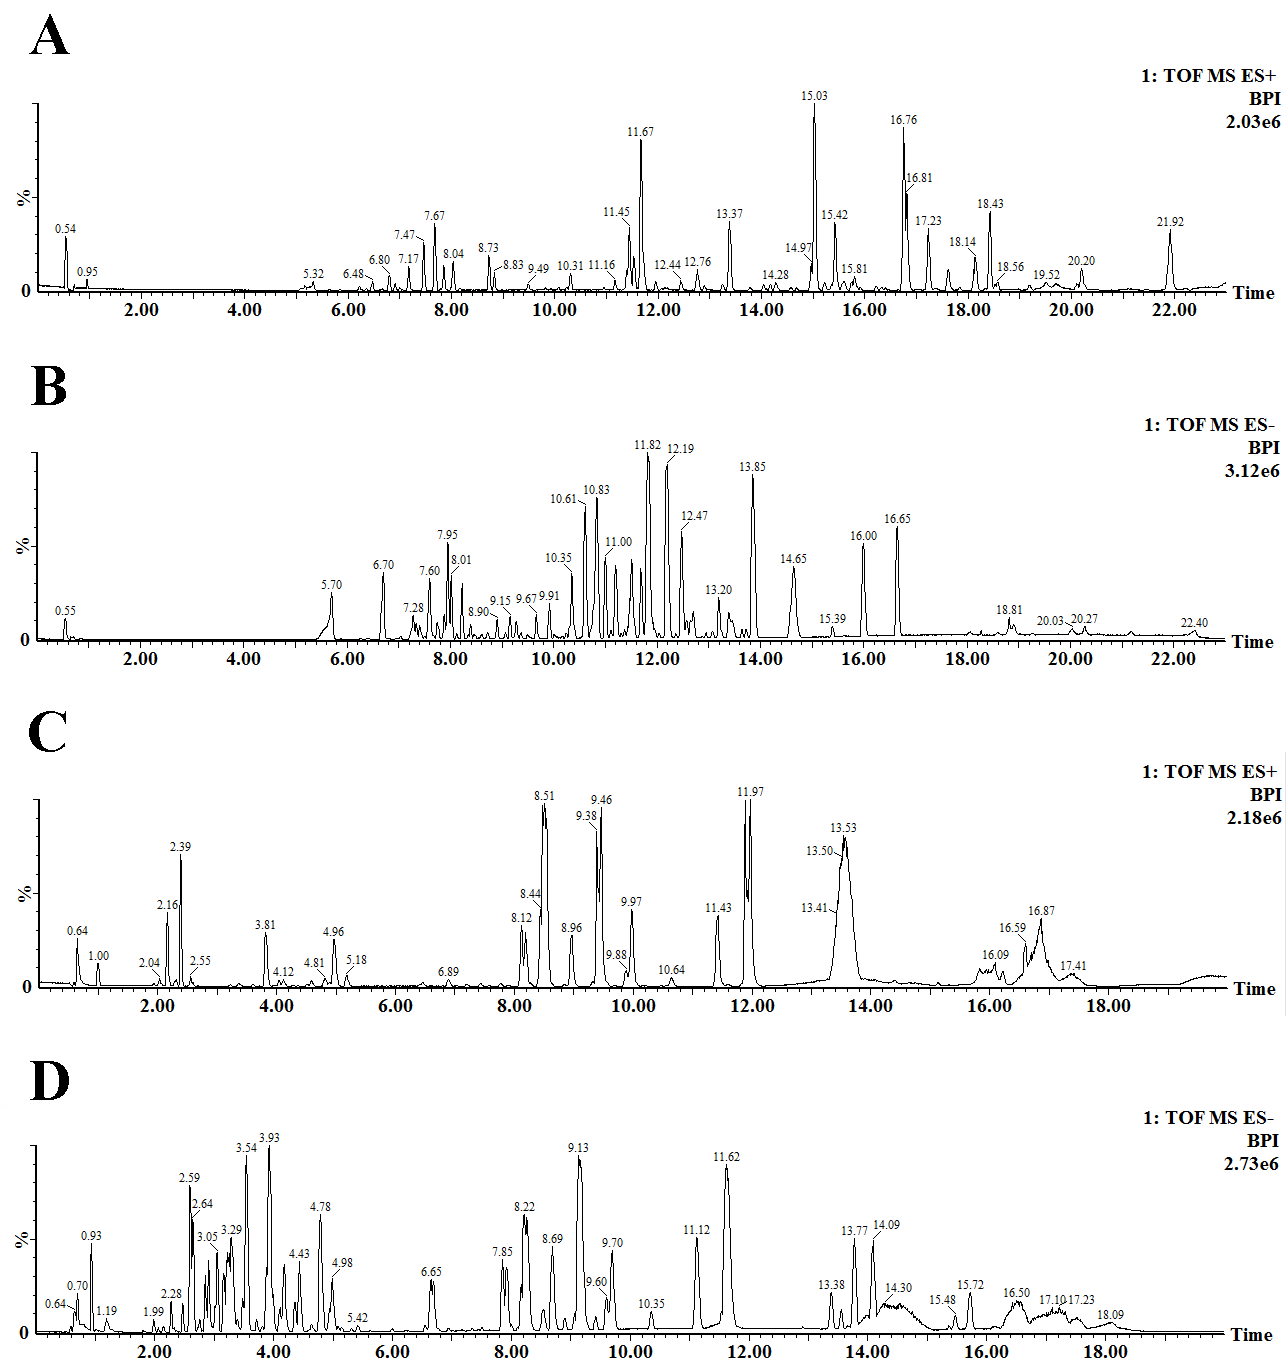


Figure S1. BPI chromatogram of fecal samples in positive ion mode (A); BPI chromatogram of fecal samples in negative ion mode (B); BPI chromatogram of serum samples in positive ion mode (C); BPI chromatogram of serum samples in negative ion mode (D).


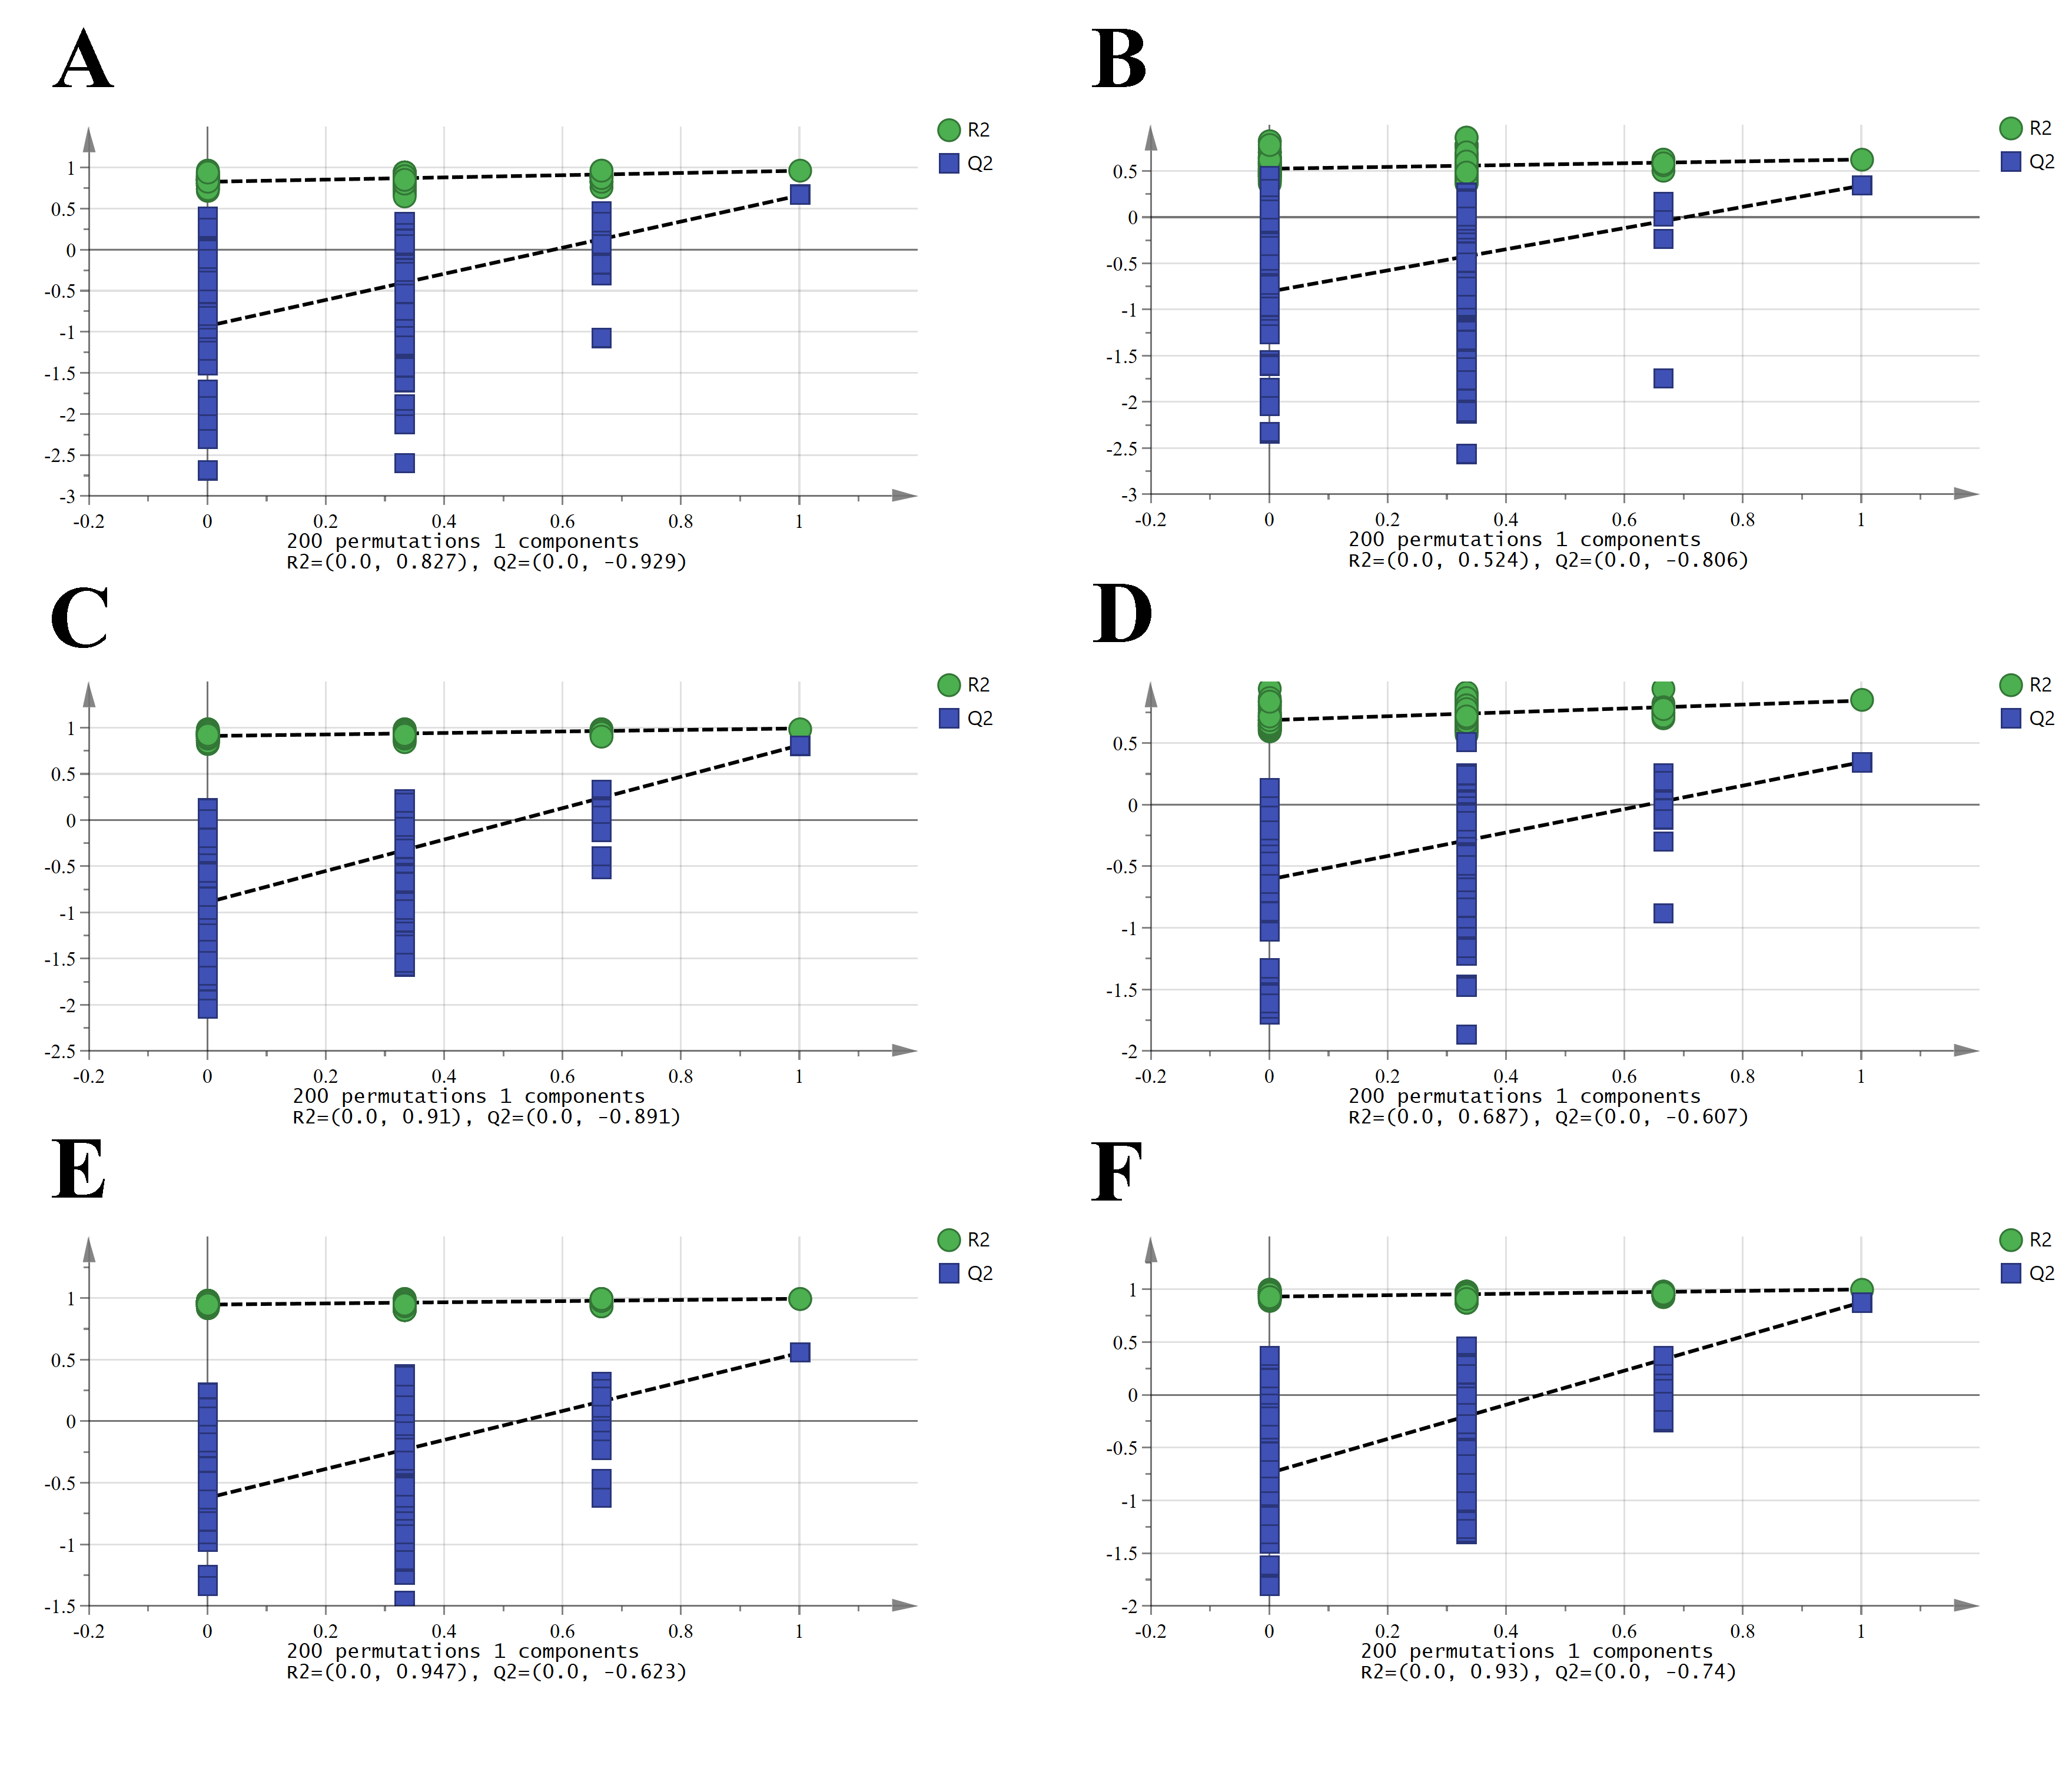


Figure S2. Validation plots of the OPLS-DA model for fecal samples. Model validation plot comparing the Ost and Sham groups in positive ion mode (A); Model validation plot comparing the Ost and Low groups in positive ion mode (B); Model validation plot comparing the Ost and High groups in positive ion mode (C); Model validation plot comparing the Ost and Sham groups in negative ion mode (D); Model validation plot comparing the Ost and Low groups in negative ion mode (E); Model validation plot comparing the Ost and High groups in negative ion mode (F).


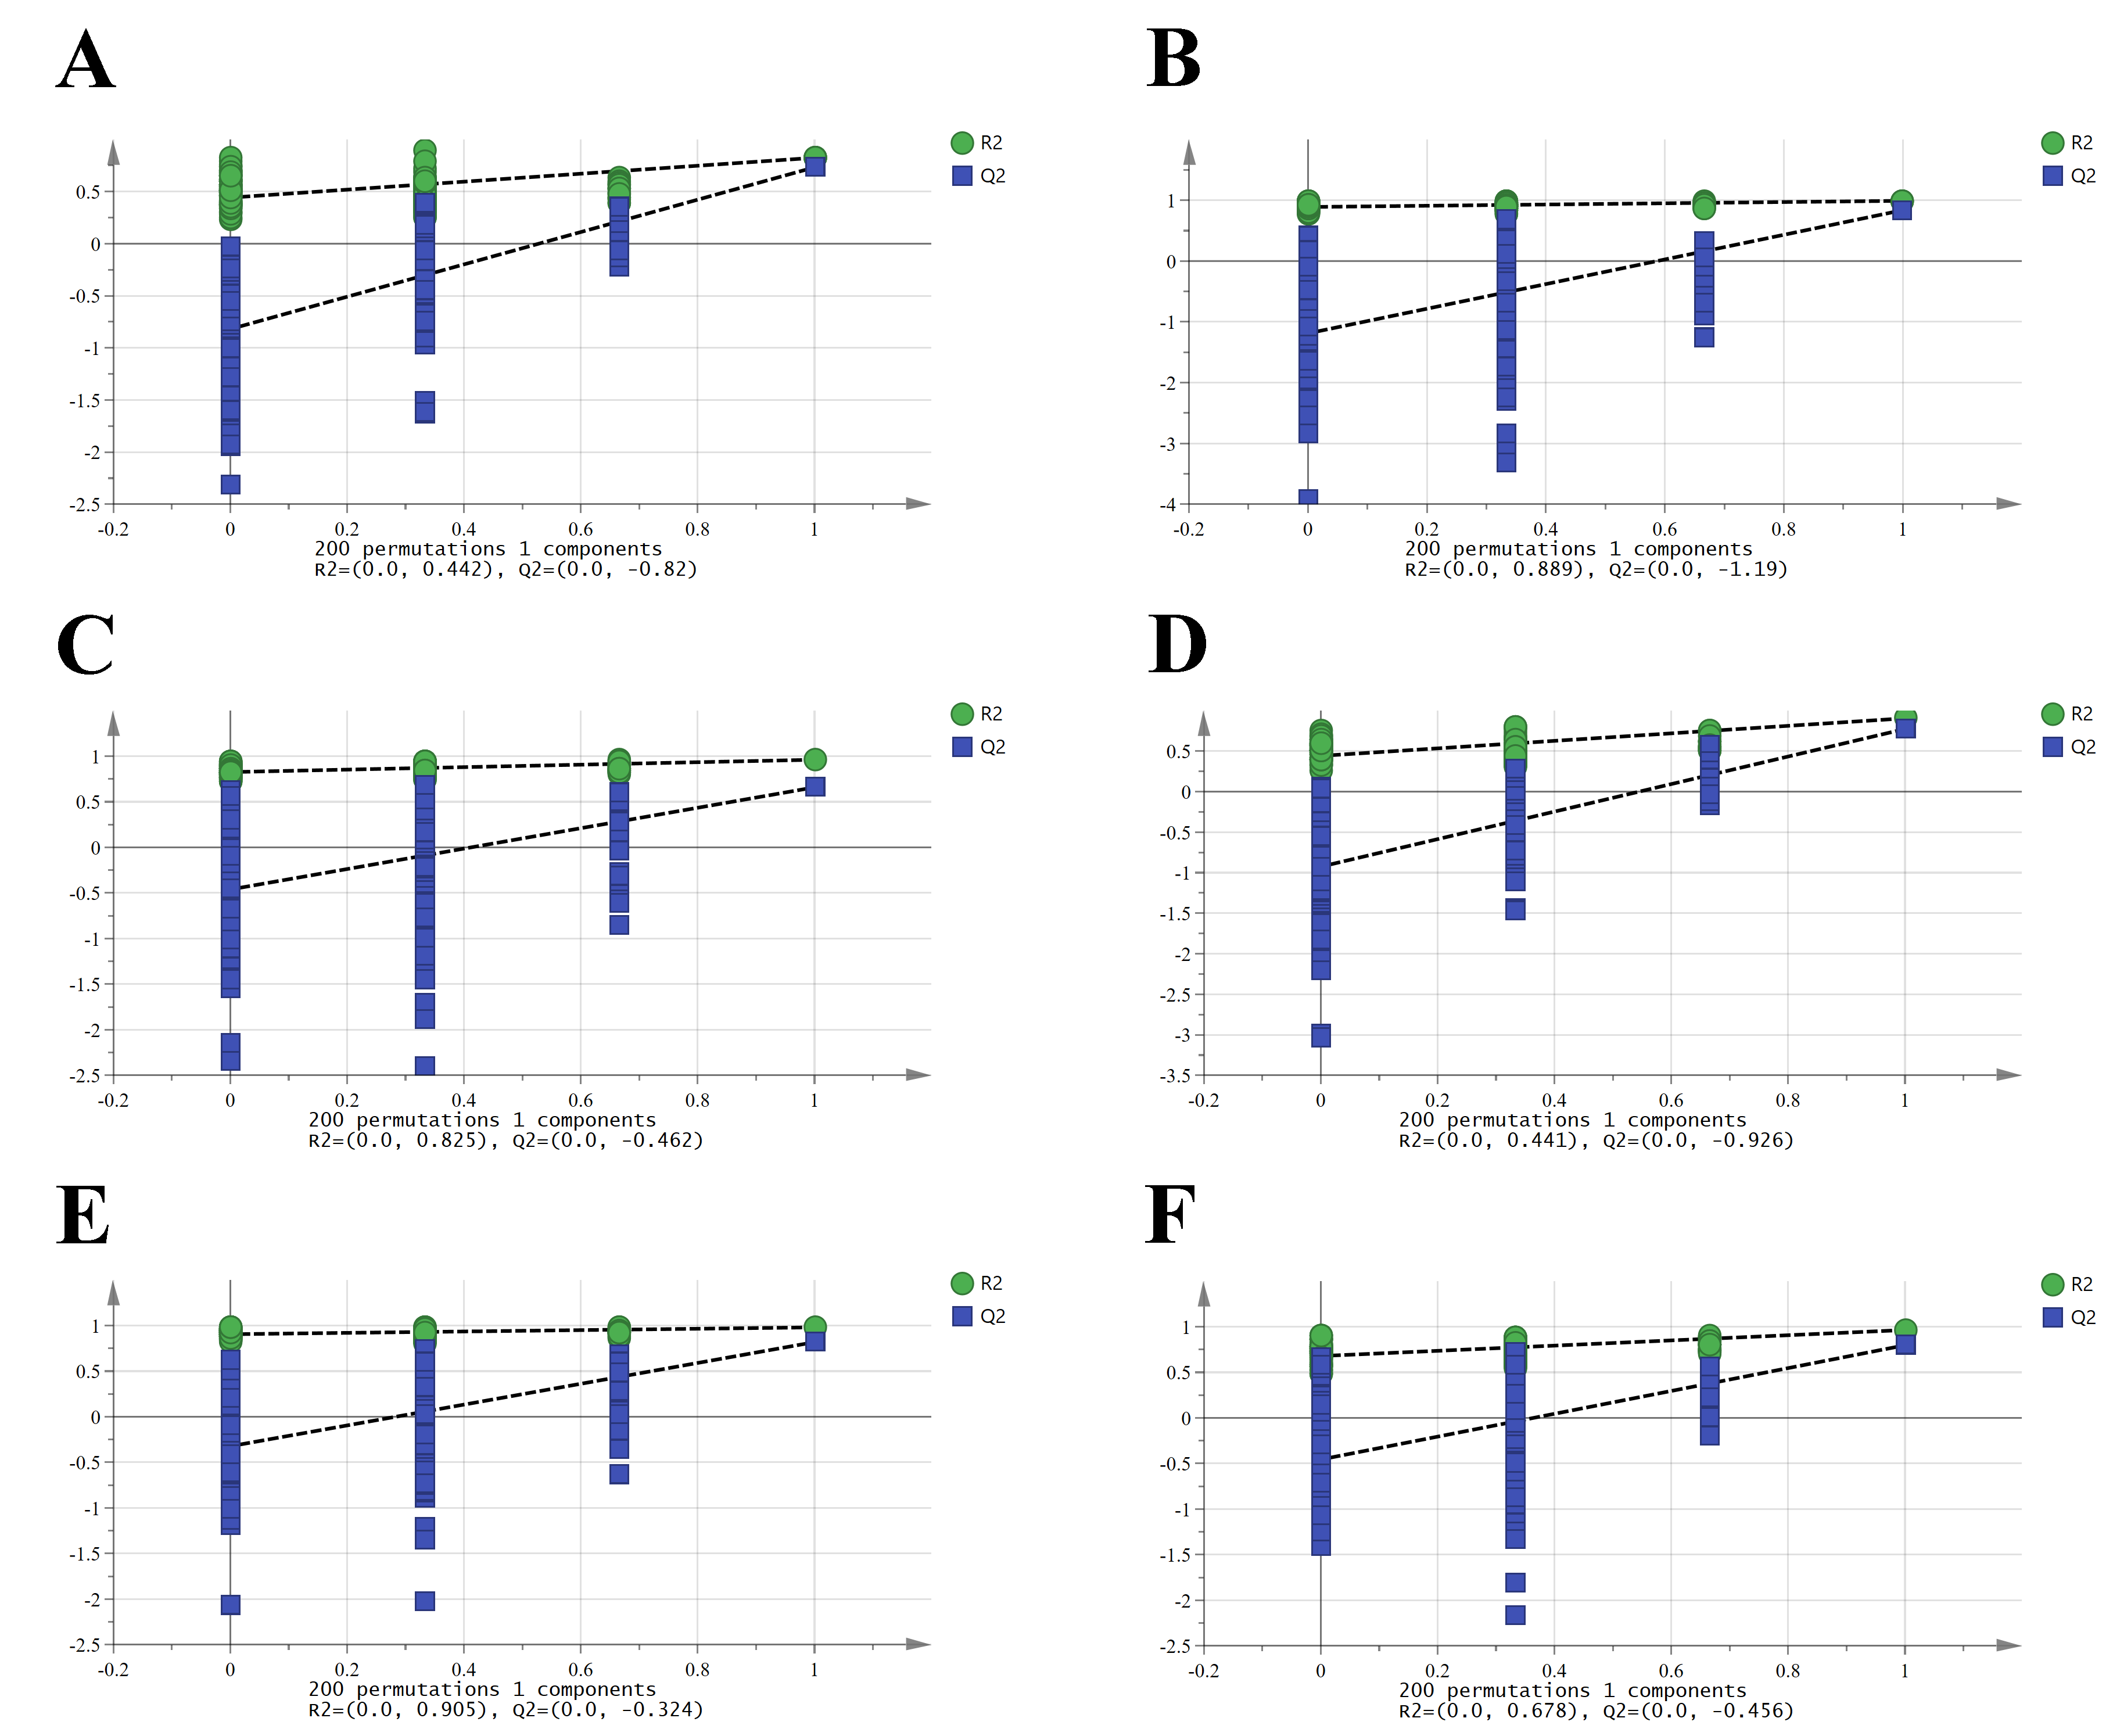


Figure S3. Validation plots of the OPLS-DA model for serum samples. Model validation plot comparing the Ost and Sham groups in positive ion mode (A); Model validation plot comparing the Ost and Low groups in positive ion mode (B); Model validation plot comparing the Ost and High groups in positive ion mode (C); Model validation plot comparing the Ost and Sham groups in negative ion mode (D); Model validation plot comparing the Ost and Low groups in negative ion mode (E); Model validation plot comparing the Ost and High groups in negative ion mode (F).


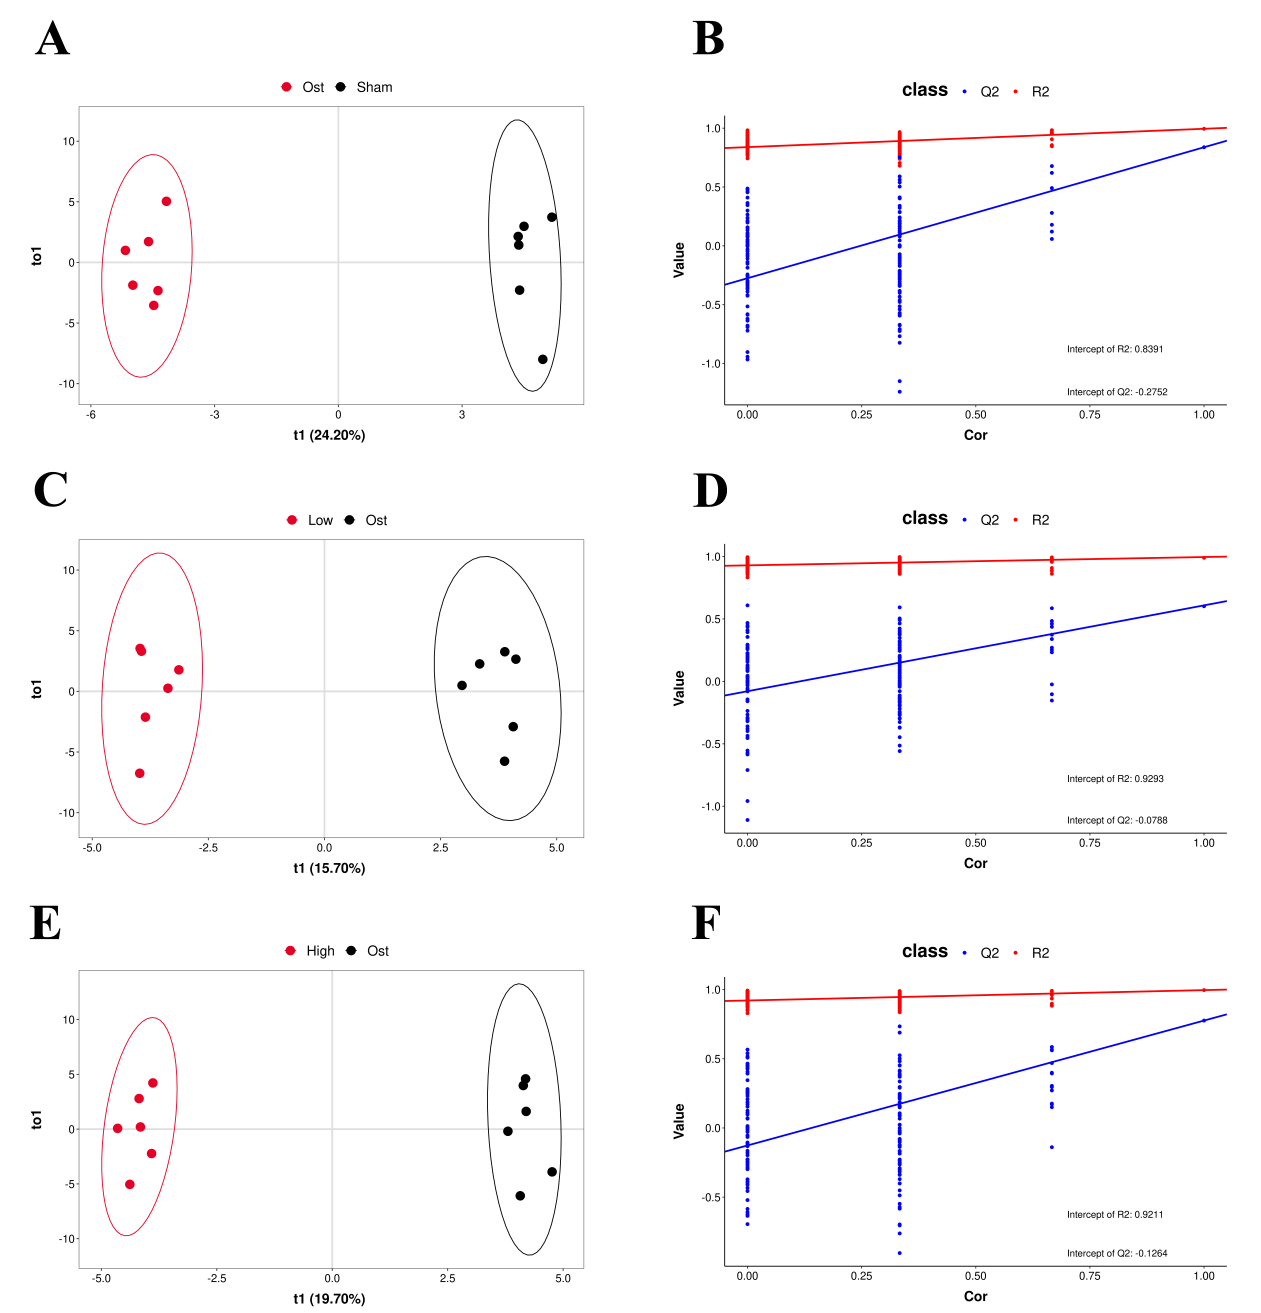


Fig. S4. OPLS-DA plot and validation plot of fecal gut microbiota.

Table S1 KEGG pathways of differential metabolites in fecal samples.

|  | Total | Expected | Hits | Raw p | Holm p | FDR |
| --- | --- | --- | --- | --- | --- | --- |
| Biosynthesis of unsaturated fatty acids | 36 | 1.61 | 6 | 0.00438 | 0.35 | 0.35 |
| Arachidonic acid metabolism | 44 | 1.97 | 6 | 0.0119 | 0.943 | 0.355 |
| Steroid hormone biosynthesis | 87 | 3.9 | 9 | 0.0133 | 1 | 0.355 |
| Linoleic acid metabolism | 5 | 0.224 | 2 | 0.0181 | 1 | 0.363 |
| Ubiquinone and other terpenoid-quinone biosynthesis | 18 | 0.807 | 3 | 0.0434 | 1 | 0.695 |
| Vitamin B6 metabolism | 9 | 0.404 | 2 | 0.0582 | 1 | 0.776 |
| Primary bile acid biosynthesis | 46 | 2.06 | 4 | 0.147 | 1 | 1 |
| Phenylalanine, tyrosine and tryptophan biosynthesis | 4 | 0.179 | 1 | 0.168 | 1 | 1 |
| Riboflavin metabolism | 4 | 0.179 | 1 | 0.168 | 1 | 1 |
| Sphingolipid metabolism | 32 | 1.43 | 3 | 0.17 | 1 | 1 |
| Retinol metabolism | 17 | 0.762 | 2 | 0.175 | 1 | 1 |
| Cysteine and methionine metabolism | 33 | 1.48 | 3 | 0.181 | 1 | 1 |
| Glycerophospholipid metabolism | 36 | 1.61 | 3 | 0.217 | 1 | 1 |
| Pantothenate and CoA biosynthesis | 20 | 0.897 | 2 | 0.225 | 1 | 1 |
| Steroid biosynthesis | 41 | 1.84 | 3 | 0.278 | 1 | 1 |
| Tryptophan metabolism | 41 | 1.84 | 3 | 0.278 | 1 | 1 |
| Valine, leucine and isoleucine biosynthesis | 8 | 0.359 | 1 | 0.308 | 1 | 1 |
| Porphyrin metabolism | 31 | 1.39 | 2 | 0.409 | 1 | 1 |
| Glycine, serine and threonine metabolism | 33 | 1.48 | 2 | 0.441 | 1 | 1 |
| Arginine and proline metabolism | 36 | 1.61 | 2 | 0.486 | 1 | 1 |
| D-Amino acid metabolism | 15 | 0.673 | 1 | 0.499 | 1 | 1 |
| Fatty acid elongation | 38 | 1.7 | 2 | 0.516 | 1 | 1 |
| Fatty acid degradation | 39 | 1.75 | 2 | 0.53 | 1 | 1 |
| Pyrimidine metabolism | 39 | 1.75 | 2 | 0.53 | 1 | 1 |
| Terpenoid backbone biosynthesis | 18 | 0.807 | 1 | 0.564 | 1 | 1 |
| Tyrosine metabolism | 42 | 1.88 | 2 | 0.571 | 1 | 1 |
| Ether lipid metabolism | 20 | 0.897 | 1 | 0.603 | 1 | 1 |
| Purine metabolism | 70 | 3.14 | 3 | 0.618 | 1 | 1 |
| Folate biosynthesis | 26 | 1.17 | 1 | 0.7 | 1 | 1 |
| Drug metabolism - cytochrome P450 | 55 | 2.47 | 2 | 0.718 | 1 | 1 |
| Alanine, aspartate and glutamate metabolism | 28 | 1.26 | 1 | 0.726 | 1 | 1 |
| Glutathione metabolism | 28 | 1.26 | 1 | 0.726 | 1 | 1 |
| Lysine degradation | 30 | 1.35 | 1 | 0.751 | 1 | 1 |
| Glyoxylate and dicarboxylate metabolism | 31 | 1.39 | 1 | 0.762 | 1 | 1 |
| Metabolism of xenobiotics by cytochrome P450 | 68 | 3.05 | 2 | 0.821 | 1 | 1 |
| Valine, leucine and isoleucine degradation | 39 | 1.75 | 1 | 0.837 | 1 | 1 |
| Drug metabolism - other enzymes | 39 | 1.75 | 1 | 0.837 | 1 | 1 |
| Amino sugar and nucleotide sugar metabolism | 42 | 1.88 | 1 | 0.858 | 1 | 1 |
| Fatty acid biosynthesis | 47 | 2.11 | 1 | 0.888 | 1 | 1 |

Table S2 KEGG pathways of differential metabolites in serum samples.

|  | Total | Expected | Hits | Raw p | Holm p | FDR |
| --- | --- | --- | --- | --- | --- | --- |
| Glycine, serine and threonine metabolism | 33 | 0.772 | 4 | 0.00637 | 0.509 | 0.509 |
| Cysteine and methionine metabolism | 33 | 0.772 | 3 | 0.0396 | 1 | 0.904 |
| Biosynthesis of unsaturated fatty acids | 36 | 0.842 | 3 | 0.0495 | 1 | 0.904 |
| Valine, leucine and isoleucine degradation | 39 | 0.912 | 3 | 0.0604 | 1 | 0.904 |
| Tryptophan metabolism | 41 | 0.959 | 3 | 0.0682 | 1 | 0.904 |
| Pantothenate and CoA biosynthesis | 20 | 0.468 | 2 | 0.0777 | 1 | 0.904 |
| Phenylalanine, tyrosine and tryptophan biosynthesis | 4 | 0.0936 | 1 | 0.0904 | 1 | 0.904 |
| Riboflavin metabolism | 4 | 0.0936 | 1 | 0.0904 | 1 | 0.904 |
| Linoleic acid metabolism | 5 | 0.117 | 1 | 0.112 | 1 | 0.993 |
| Sphingolipid metabolism | 32 | 0.749 | 2 | 0.171 | 1 | 1 |
| Valine, leucine and isoleucine biosynthesis | 8 | 0.187 | 1 | 0.173 | 1 | 1 |
| Phenylalanine metabolism | 8 | 0.187 | 1 | 0.173 | 1 | 1 |
| Arginine and proline metabolism | 36 | 0.842 | 2 | 0.205 | 1 | 1 |
| Fatty acid elongation | 38 | 0.889 | 2 | 0.222 | 1 | 1 |
| Fatty acid degradation | 39 | 0.912 | 2 | 0.231 | 1 | 1 |
| D-Amino acid metabolism | 15 | 0.351 | 1 | 0.3 | 1 | 1 |
| Nicotinate and nicotinamide metabolism | 15 | 0.351 | 1 | 0.3 | 1 | 1 |
| Fatty acid biosynthesis | 47 | 1.1 | 2 | 0.302 | 1 | 1 |
| Retinol metabolism | 17 | 0.398 | 1 | 0.333 | 1 | 1 |
| Folate biosynthesis | 26 | 0.608 | 1 | 0.462 | 1 | 1 |
| Alanine, aspartate and glutamate metabolism | 28 | 0.655 | 1 | 0.488 | 1 | 1 |
| Purine metabolism | 70 | 1.64 | 2 | 0.494 | 1 | 1 |
| Glycerophospholipid metabolism | 36 | 0.842 | 1 | 0.578 | 1 | 1 |
| Pyrimidine metabolism | 39 | 0.912 | 1 | 0.607 | 1 | 1 |
| Steroid hormone biosynthesis | 87 | 2.04 | 2 | 0.615 | 1 | 1 |
| N-Glycan biosynthesis | 40 | 0.936 | 1 | 0.617 | 1 | 1 |
| Amino sugar and nucleotide sugar metabolism | 42 | 0.982 | 1 | 0.635 | 1 | 1 |
| Drug metabolism - cytochrome P450 | 55 | 1.29 | 1 | 0.734 | 1 | 1 |

Table S3 sqrtIVt values of the top30 species in abundance.

| Factor | High_sqrtIVt | Low_sqrtIVt | Ost_sqrtIVt | Sham_sqrtIVt |
| --- | --- | --- | --- | --- |
| Ligilactobacillus | 0.45 | 0.59 | 0.42 | 0.53 |
| Muribaculaceae_unclassified | 0.43 | 0.47 | 0.66 | 0.40 |
| Lachnospiraceae_NK4A136_group | 0.43 | 0.62 | 0.53 | 0.39 |
| Firmicutes_unclassified | 0.53 | 0.54 | 0.49 | 0.44 |
| Clostridia_UCG-014_unclassified | 0.57 | 0.48 | 0.47 | 0.47 |
| Ruminococcus | 0.59 | 0.46 | 0.47 | 0.47 |
| Lachnospiraceae_unclassified | 0.52 | 0.54 | 0.46 | 0.47 |
| Lactobacillus | 0.29 | 0.35 | 0.61 | 0.65 |
| UCG-005 | 0.54 | 0.26 | 0.70 | 0.39 |
| Quinella | 0.43 | 0.41 | 0.04 | 0.80 |
| Monoglobus | 0.59 | 0.49 | 0.29 | 0.57 |
| Clostridiales_unclassified | 0.47 | 0.54 | 0.58 | 0.39 |
| Eubacterium]_coprostanoligenes_group_unclassified | 0.60 | 0.37 | 0.53 | 0.48 |
| HT002 | 0.25 | 0.49 | 0.50 | 0.67 |
| Incertae_Sedis | 0.48 | 0.58 | 0.33 | 0.57 |
| Eubacterium]_xylanophilum_group | 0.49 | 0.47 | 0.47 | 0.56 |
| Streptococcus | 0.47 | 0.54 | 0.19 | 0.67 |
| Intestinimonas | 0.48 | 0.43 | 0.36 | 0.68 |
| Desulfovibrio | 0.47 | 0.53 | 0.56 | 0.43 |
| Colidextribacter | 0.46 | 0.49 | 0.37 | 0.65 |
| Dubosiella | 0.26 | 0.38 | 0.70 | 0.14 |
| Phascolarctobacterium | 0.52 | 0.33 | 0.69 | 0.27 |
| Bacteroidota_unclassified | 0.65 | 0.26 | 0.22 | 0.68 |
| Ruminococcaceae_unclassified | 0.46 | 0.51 | 0.46 | 0.56 |
| Candidatus_Saccharimonas | 0.60 | 0.40 | 0.31 | 0.62 |
| Roseburia | 0.44 | 0.56 | 0.48 | 0.51 |
| Akkermansia | 0.47 | 0.40 | 0.53 | 0.58 |
| Romboutsia | 0.55 | 0.54 | 0.57 | 0.29 |
| Prevotellaceae_UCG-003 | 0.52 | 0.34 | 0.05 | 0.77 |
| Eubacterium]_siraeum_group | 0.74 | 0.38 | 0.21 | 0.48 |
